# Supplementary material for: Faithful SGCE imprinting in iPSC-derived cortical neurons: an endogenous cellular model of myoclonus-dystonia
Source: PubMed Central journal article supplement (PMC5290732; doi:10.1038/srep41156), 2017-02-03
Supplement: srep41156-s1.pdf [file srep41156-s1.pdf]

## **Supplementary Information**

### **Faithful *SGCE* imprinting in iPSC-derived cortical neurons: an endogenous cellular model of myoclonus-dystonia**

Karen Grütz, MSc; Philip Seibler, PhD; Anne Weissbach, MD; Katja Lohmann, PhD; Francesca A. Carlisle, BSc; Derek J. Blake, DPhil; Ana Westenberger, PhD; Christine Klein\*, MD; Anne Grünewald, PhD

#### **Corresponding author:**

Christine Klein, MD

[Christine.klein@neuro.uni-luebeck.de](mailto:Christine.klein@neuro.uni-luebeck.de)

Institute of Neurogenetics, University of Lübeck, Lübeck, Germany

**Supplementary Table S1** Primers for quantification of cDNA, PCR-amplification and sequencing of bisulfite-treated genomic DNA, and PCR-amplification and sequencing of SGCE cDNA

| Gene                                      | Template | Application | Forward 5'-3'                  | Reverse 5'-3'               |
|-------------------------------------------|----------|-------------|--------------------------------|-----------------------------|
| <i>ACTB</i>                               | cDNA     | qPCR        | TGAAGTGTGACGTGGACATC           | GGAGGAGCAATGATCTTGAT        |
| <i>HPRT1</i>                              | cDNA     | qPCR        | ATCAGACTGAAGAGCTATTGTAATGACCA  | TGGCTTATATCCAACACTTCGTG     |
| <i>OCT4</i> endo <sup>1</sup>             | cDNA     | qPCR        | CCTCACTTCACTGCACTGTA           | CAGGTTTTCTTTCCCTAGCT        |
| <i>OCT4</i> trans <sup>1</sup>            | cDNA     | qPCR        | CCTCACTTCACTGCACTGTA           | CCTTGAGGTACCAGAGATCT        |
| <i>SOX2</i> endo <sup>1</sup>             | cDNA     | qPCR        | CCCAGCAGACTTCACATGT            | CCTCCCATTTCCCTCGTTTT        |
| <i>SOX2</i> trans <sup>1</sup>            | cDNA     | qPCR        | CCCAGCAGACTTCACATGT            | CCTTGAGGTACCAGAGATCT        |
| <i>KLF4</i> endo <sup>1</sup>             | cDNA     | qPCR        | GATGAACTGACCAGGCACTA           | GTGGGTCATATCCACTGTCT        |
| <i>KLF4</i> trans <sup>1</sup>            | cDNA     | qPCR        | GATGAACTGACCAGGCACTA           | CCTTGAGGTACCAGAGATCT        |
| <i>cMYC</i> endo <sup>1</sup>             | cDNA     | qPCR        | TGCCTCAAATTGGACTTTGG           | GATTGAAATTCTGTGTAAGTGC      |
| <i>cMYC</i> trans <sup>1</sup>            | cDNA     | qPCR        | TGCCTCAAATTGGACTTTGG           | CGCTCGAGGTTAACGAATT         |
| <i>NANOG</i> <sup>1</sup>                 | cDNA     | qPCR        | TGAACCTCAGCTACAAACAG           | TGGTGGTAGGAAGAGTAAAG        |
| <i>GDF3</i> <sup>1</sup>                  | cDNA     | qPCR        | AAATGTTTGTGTTGCGGTCA           | TCTGGCACAGGTGTCTTCAG        |
| <i>GATA4</i> endoderm <sup>1</sup>        | cDNA     | qPCR        | CTAGACCGTGGGTTTTGCAT           | TGGGTTAAGTGCCCCTGTAG        |
| <i>AFP</i> endoderm <sup>1</sup>          | cDNA     | qPCR        | AGCTTGGTGGTGGATGAAAC           | CCCTCTTCAGCAAAGCAGAC        |
| <i>SOX17</i> endoderm                     | cDNA     | qPCR        | CTCTGCCTCCTCCACGAA             | CAGAATCCAGACCTGCACAA        |
| <i>RUNX1</i> mesoderm <sup>1</sup>        | cDNA     | qPCR        | CCCTAGGGGATGTTCCAGAT           | TGAAGCTTTTCCCTCTTCCA        |
| <i>MSX1</i> mesoderm                      | cDNA     | qPCR        | CGAGAGGACCCCGTGGATGCAGAG       | GGCGGCCATCTTCAGCTTCTCCAG    |
| <i>MYH6</i> mesoderm                      | cDNA     | qPCR        | TCAGCTGGAGGCCAAAGTAAAGGA       | TTCTTGAGCTCTGAGCACTCGTCT    |
| <i>NCAM</i> ectoderm <sup>1</sup>         | cDNA     | qPCR        | ATGGAAACTCTATTAAGTGAACCTG      | TAGACCTCATACTCAGCATTCCAGT   |
| <i>PAX6</i> ectoderm                      | cDNA     | qPCR        | GTCCATCTTTGCTTGGGAAA           | TAGCCAGGTTGCGAAGAAGT        |
| <i>NES</i> ectoderm <sup>1</sup>          | cDNA     | qPCR        | GCGTTGGAACAGAGGTTGGA           | TGGGAGCAAAGATCCAAGAC        |
| <i>MAP2</i>                               | cDNA     | qPCR        | CAGGTGGCGGACGTGTGAAAATTGAGAGTG | CACGCTGGATCTGCCTGGGGACTGTG  |
| <i>PEG10</i>                              | cDNA     | qPCR        | TGTCGTCCGGAGCCACTC             | AGGGTGACGGTTGGGGTG          |
| <i>Brain-specific SGCE</i>                | cDNA     | qPCR        | GGAGATTTTCGTTTGACAAC           | CAACATGCATAACATATGCCAG      |
| <i>SGCE</i> PromM <sup>2</sup>            | gDNA     | PCR, Seq    | GTGTTATGTTTTATAAATAGATAAG      | CAACTCATATACCTCTACAATTC     |
| <i>SGCE</i> Prom Un-methylated            | gDNA     | PCR, Seq    | TTTTATAAATAGATAAGTGTTTTAAATGT  | CAACTCATATACCTCTACAATTC     |
| <i>SGCE</i> Prom Methylated               | gDNA     | PCR, Seq    | TTTATAAATAGATAAGCGTTTTAAATGC   | ACTACGACTACTTTATTTATAACGCAA |
| <i>SGCE</i> whole transcript <sup>3</sup> | cDNA     | PCR, Seq    | CTGATGCTGAACTGGCCAAG           | CAACATGCATAACATATGCCAG      |
| <i>SGCE</i> Ex 3 internal <sup>2</sup>    | cDNA     | Seq         | GCGAGATTAGTAATGATCCC           |                             |

endo - endogenous, trans - transgene, qPCR - quantitative PCR, Seq – Sequencing

- 1 Park, I. H. *et al.* Reprogramming of human somatic cells to pluripotency with defined factors. *Nature* **451**, 141-146, doi:nature06534 [pii] 10.1038/nature06534 (2008).
- 2 Muller, B. *et al.* Evidence that paternal expression of the epsilon-sarcoglycan gene accounts for reduced penetrance in myoclonus-dystonia. *Am J Hum Genet* **71**, 1303-1311 (2002).
- 3 Xiao, J., Nance, M. A. & LeDoux, M. S. Incomplete nonsense-mediated decay facilitates detection of a multi-exonic deletion mutation in SGCE. *Clin Genet* **84**, 276-280, doi:10.1111/cge.12059 (2013).
